# Supplementary material for: A Small Set of Succinct Signature Patterns Distinguishes Chinese and Non-Chinese HIV-1 Genomes
Source: PLOS journal article supplement (doi:10.1371/journal.pone.0058804), 2013-03-19
Supplement: S1 (10.1371/journal.pone.0058804.s001) [file journal.pone.0058804.s001]

## Phylogenetic clustering of Env553

Supplementary information for:

### A small set of succinct signature patterns distinguishes Chinese and non-Chinese HIV-1 genomes

Yan Wang<sup>1,2,†</sup>, Reda Rawi<sup>1,†</sup>, Christoph Wilms<sup>1</sup>, Dominik Heider<sup>1</sup>, Rongge Yang<sup>2,\*</sup>,  
Daniel Hoffmann<sup>1,\*</sup>

1 Research Group Bioinformatics, Center for Medical Biology, University of Duisburg-Essen, Essen, Germany; 2 AIDS and HIV Research Group, State key Laboratory of Virology, Wuhan Institute of Virology, Chinese Academy of Sciences, Wuhan, P.R.China;\* E-mail: ryang@wh.iov.cn, daniel.hoffmann@uni-due.de

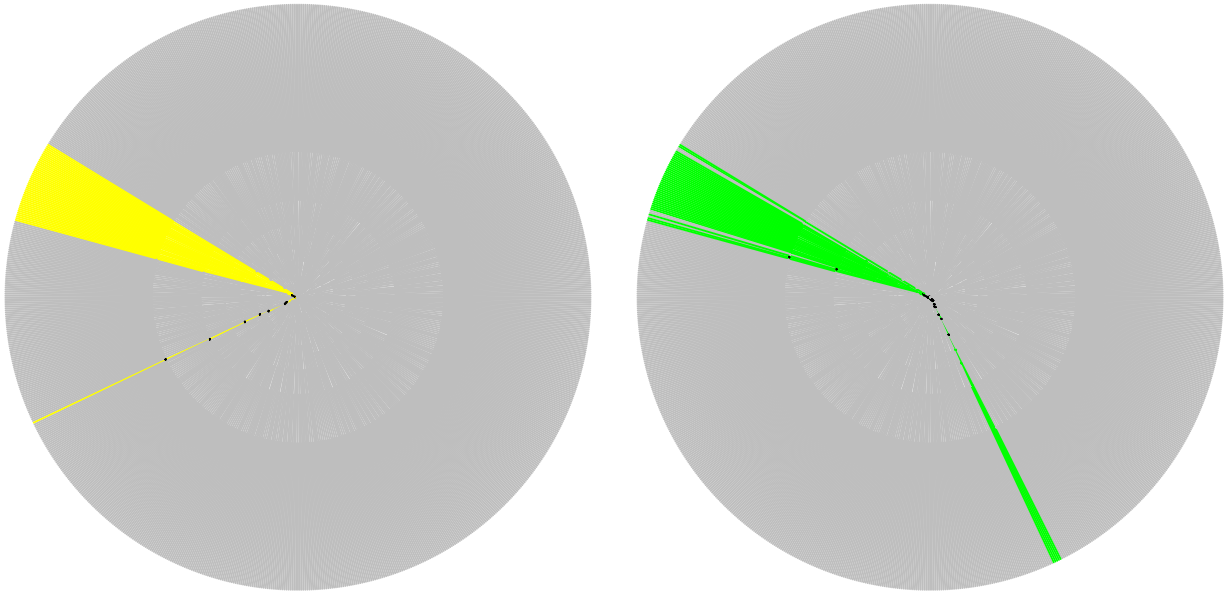

Figure 1: Phylogenetic clustering of the Env position corresponding to HXB2 Env553. The underlying fan tree is the same described in the main manuscript. Left side: branches in agreement with pattern Env553 = R colored yellow. Right side: branches of subtype B samples from China colored green. The comparison shows that Env553 = R is a good marker for Chinese sequences.
