# Supplementary material for: A Small Set of Succinct Signature Patterns Distinguishes Chinese and Non-Chinese HIV-1 Genomes
Source: PLOS journal article supplement (doi:10.1371/journal.pone.0058804), 2013-03-19
Supplement: S2 (10.1371/journal.pone.0058804.s002) [file journal.pone.0058804.s002]

## Phylogenetic clustering of Env167 and Env792

—

Supplementary information for:

### **A small set of succinct signature patterns distinguishes Chinese and non-Chinese HIV-1 genomes**

Yan Wang<sup>1,2,†</sup>, Reda Rawi<sup>1,†</sup>, Christoph Wilms<sup>1</sup>, Dominik Heider<sup>1</sup>, Rongge Yang<sup>2,\*</sup>,  
Daniel Hoffmann<sup>1,\*</sup>

1 Research Group Bioinformatics, Center for Medical Biology, University of Duisburg-Essen, Essen, Germany; 2 AIDS and HIV Research Group, State key Laboratory of Virology, Wuhan Institute of Virology, Chinese Academy of Sciences, Wuhan, P.R.China;\* E-mail: ryang@wh.iov.cn, daniel.hoffmann@uni-due.de

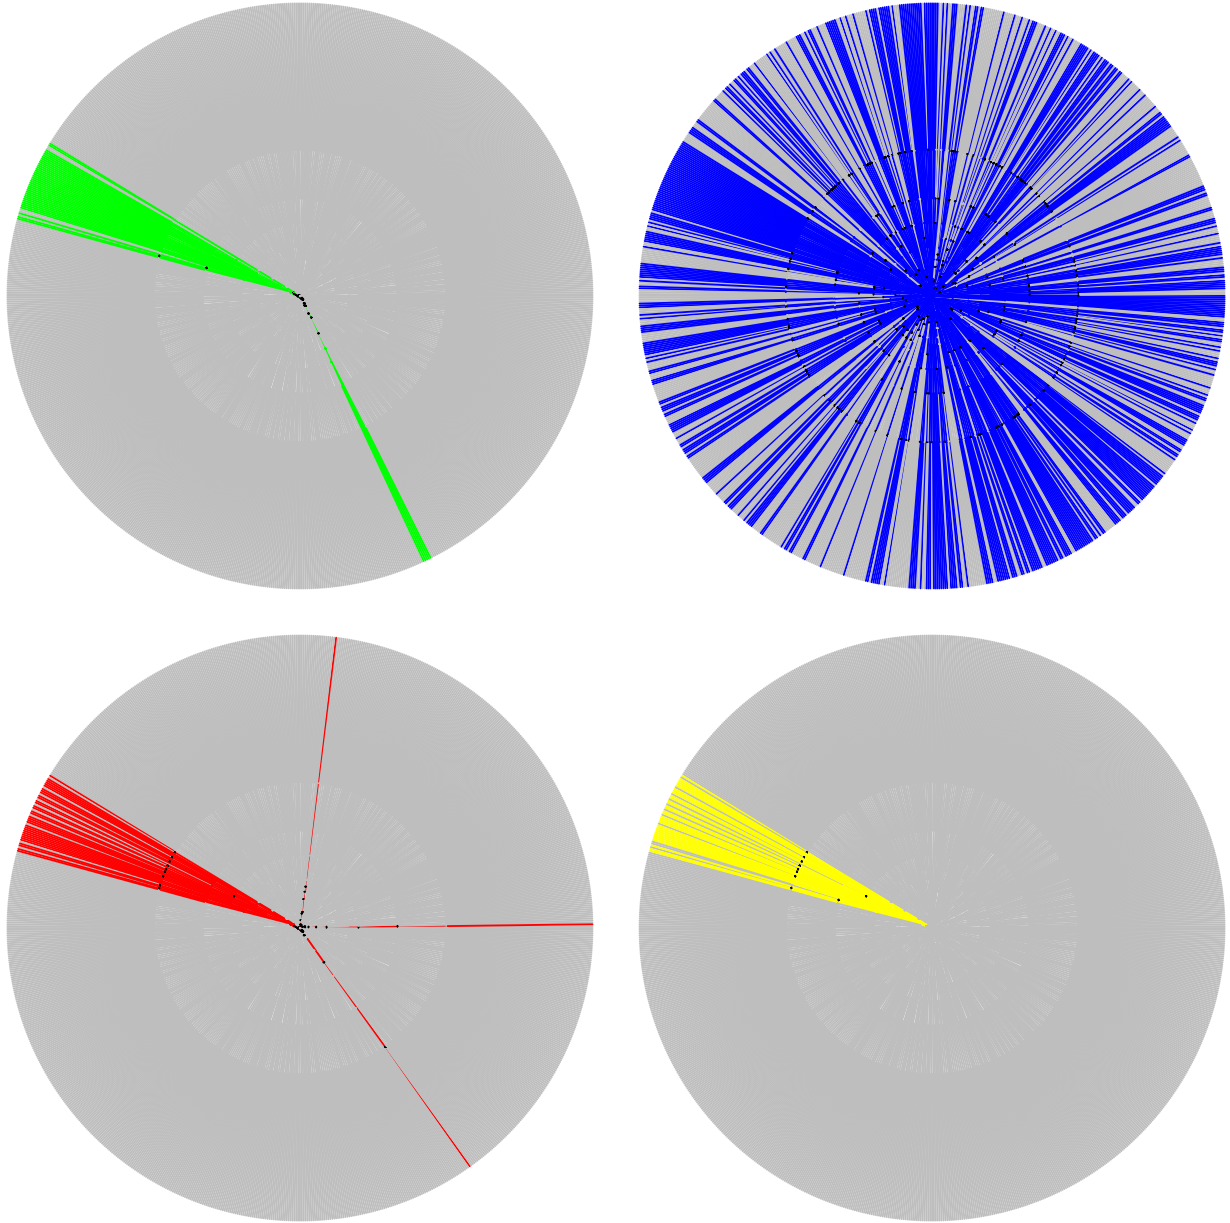

Figure 1: Phylogenetic clustering of Env positions corresponding to HXB2 Env positions 167 and 792. The underlying fan tree is the same described in the main manuscript. Top left (green): branches of subtype B samples from China. Top right (blue): branches matching pattern Env792 = A. Bottom left (red): branches matching Env167 = T. Bottom right (yellow): branches matching Env167 = T AND Env792 = A. The comparison between top left and bottom right shows that pattern Env167 = T AND Env792 = A is a good marker for Chinese sequences.
